# Supplementary material for: Phase 3, long-term, open-label extension period of safety and efficacy of belimumab in patients with systemic lupus erythematosus in China, for up to 6 years
Source: HighWire-hosted journal article supplement (doi:10.1136/rmdopen-2021-001669), 2022-04-01
Supplement: rmdopen-2021-001669supp001_data_supplement.pdf [file rmdopen-2021-001669supp001_data_supplement.pdf]

**A Phase 3, long-term, open-label extension period of safety and efficacy of belimumab in patients with systemic lupus erythematosus in China, for up to 6 years**

Fengchun Zhang<sup>1</sup>, Jie Zheng<sup>2</sup>, Yang Li<sup>3</sup>, Guochun Wang<sup>4</sup>, Mingjun Wang<sup>5</sup>, Yin Su<sup>6</sup>, Jieruo Gu<sup>7</sup>, Xingfu Li<sup>8</sup>, Damon Bass<sup>9</sup>, Myron Chu<sup>9\*</sup>, Paula Curtis<sup>10</sup>, Kathleen DeRose<sup>9</sup>, Regina Kurrasch<sup>9</sup>, Jenny Lowe<sup>11</sup>, Paige Meizlik<sup>9</sup>, David Roth<sup>9</sup>

<sup>1</sup>Department of Rheumatology and Clinical Immunology, Peking Union Medical College Hospital, Chinese Academy of Medical Sciences and Peking Union Medical College, Beijing, China; <sup>2</sup>Department of Dermatology, Ruijin Hospital, School of Medicine, Shanghai Jiao Tong University, Shanghai, China; <sup>3</sup>Department of Rheumatology, The Second Affiliated Hospital, Harbin Medical University, Nangang District, Harbin, China; <sup>4</sup>Department of Rheumatology, China-Japan Friendship Hospital, Beijing, China; <sup>5</sup>Department of Rheumatology, The First Affiliated Hospital of Soochow University, Suzhou, China; <sup>6</sup>Department of Rheumatology and Immunology, Peking University People's Hospital, Beijing, China; <sup>7</sup>Department of Rheumatology and Immunology, The Third Affiliated Hospital of Sun Yat-Sen University, Guangzhou, Guangdong, China; <sup>8</sup>Department of Rheumatology, Qilu Hospital of Shandong University, Jinan, China; <sup>9</sup>Immunoinflammation, GlaxoSmithKline, Collegeville, PA, USA; <sup>10</sup>Biostatistics, GlaxoSmithKline, Brentford, Middlesex, UK; <sup>11</sup>Immunoinflammation and Fibrosis, GlaxoSmithKline, Brentford, Middlesex, UK

\*At the time of the study

**Corresponding author:** Kathleen DeRose

R&D Immunoinflammation, GlaxoSmithKline, 1259 S. Collegeville Road UP4310, Collegeville, Pennsylvania, PA 19426-0989, USA

Tel: +1 215-915-7316

E-mail: [kathleen.2.derose@gsk.com](mailto:kathleen.2.derose@gsk.com)

**Target journal:** [RMD Open](#)

**Word count:** 3225 (max. 3000; excluding title page, abstract, references, and figures and tables)

**Figures/Tables:** 7 (max. 8)

**References:** 32 (max. 50)

**Supplementary materials:** No limit on file number; published online only as a PDF file

**Target submission:** August 2021

## SUPPLEMENTARY MATERIALS

### Supplementary Methods

#### Key patient eligibility criteria

Inclusion and exclusion criteria for the double-blind BEL113750 study have been previously reported.<sup>1</sup>

Additionally, patients enrolling in the open-label period of the BEL113750 study met the following criteria:

- Have completed the double-blind BEL113750 Protocol through Week 48.
- Be able to receive the first dose of belimumab for the open-label period 4 weeks (minimum of 2 weeks, maximum of 8 weeks) after the last dose in the double-blind BEL113750 period.

#### Key exclusion criteria

Have developed clinical evidence of significant, unstable or uncontrolled, acute or chronic diseases not due to SLE, or experienced an adverse event (AE) in the double-blind BEL113750 period that could, in the opinion of the principal investigator, put the patient at undue risk.

#### Permissible SLE therapy

Once the patient received the first dose of study treatment on Day 0 of the open-label period, the use of permitted concurrent SLE therapy could be adjusted (added, eliminated, changed dose level/frequency) by the investigator as clinically required in response to improving or worsening conditions.

The use of traditional and herbal remedies as part of the local standard therapy for non-SLE illness was permitted (e.g. glycosides of Paeony or Tripterygium).

#### Prohibited medications and non-drug therapies

The use of the following medications and therapies was prohibited at any time during the study, including the OL period. Patients who started prohibited medications and therapies at any time during the open-label period were withdrawn from open-label treatment with belimumab and entered study follow-up:

- Other investigational agents (biologic and non-biologic)
- Co-enrolment into another study of an investigational agent or non-drug therapy that may have interfered with the conduct of this protocol
- Anti-tumour necrosis factor or anti-interleukin (IL)-6 therapy (e.g. adalimumab, etanercept, or infliximab)
- Other biologics (e.g. rituximab, abatacept, IL-1 receptor antagonist [anakinra])
- Intravenous immunoglobulin
- Intravenous cyclophosphamide
- Plasmapheresis and leukapheresis.

Additionally, live vaccines were not permitted in the study.

#### **Adverse events**

Adverse events were coded according to the Medical Dictionary for Regulatory Activities System Organ Class and Preferred Term. Toxicity grades for clinical laboratory parameters were modified from the Division of Microbiology and Infectious Diseases Adverse Event Adult Toxicity Tables.<sup>2</sup>

#### **Definition of proteinuria**

Proteinuria was defined as a urine spot protein creatinine ratio >0.5 g/24 hr at baseline.

#### **Definition of SFI flares**

SELENA-SLEDAI flare index (SFI) flare: SLE flares were defined as a mild/moderate or severe, according to the modified SFI (excluded severe flares from the SELENA-SLEDAI flare assessment that were triggered only by an increase in SELENA-SLEDAI score to >12).

#### **Supplementary references**

1. Zhang F, Bae SC, Bass D, et al. A pivotal phase III, randomised, placebo-controlled study of belimumab in patients with systemic lupus erythematosus located in China, Japan and South Korea. *Ann Rheum Dis*. 2018;77(3): 355–363.
2. Diseases DoMal. Adult Toxicity Table. Available at: <https://www.niaid.nih.gov/sites/default/files/dmidadulttox.pdf>. Accessed April 2020.

## Supplementary figures and tables

**Supplementary Figure 1. Percentage change in proteinuria from baseline by visit among patients with baseline proteinuria >0.5 g/24 hr (Efficacy population; N=399)**

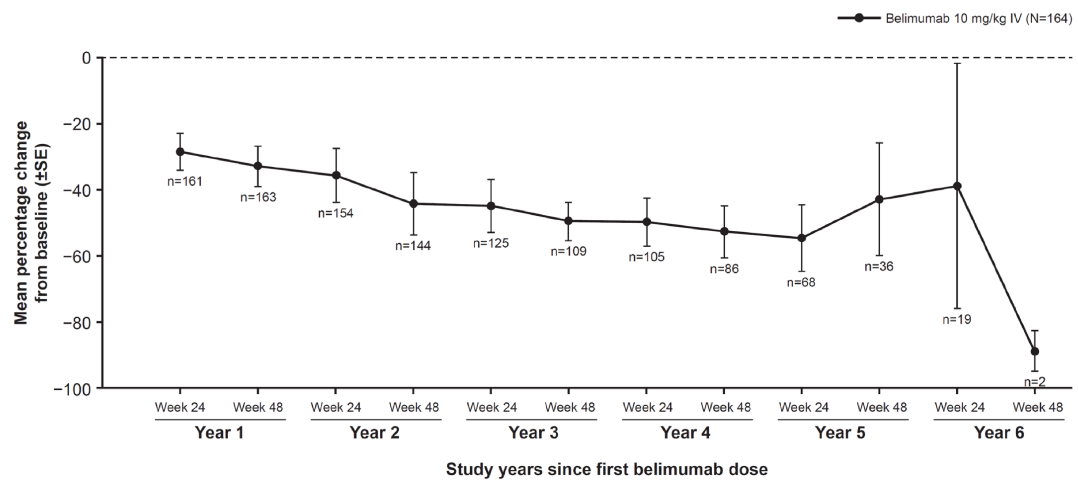

**Note:** Baseline was defined as the last available value prior to belimumab initiation: Day 1 for patients randomised to belimumab in the double-blind period and Week 52 for patients randomised to placebo in the double-blind period.

SE, standard error

**Supplementary Figure 2. Percentage change from baseline in (A) SELENA-SLEDAI score and (B) PGA score by visit (Efficacy population; N=399)**

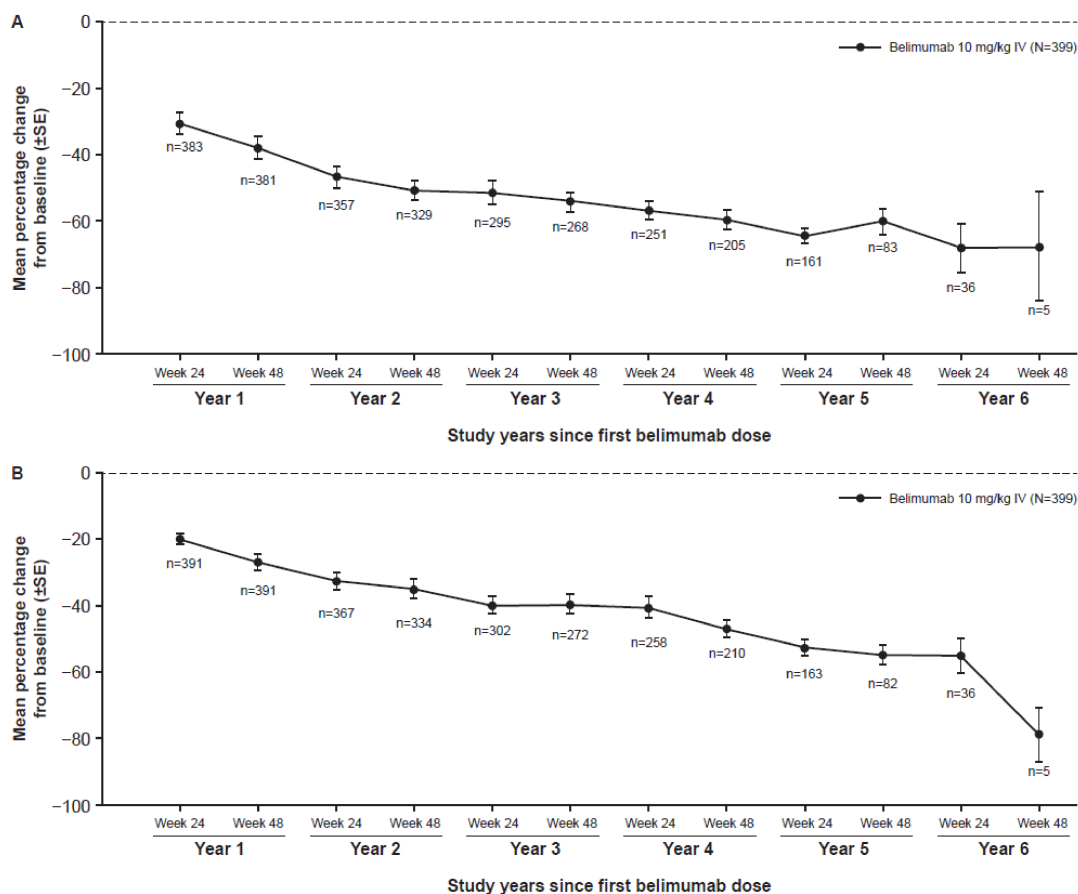

**Note:** Baseline was defined as the last available value prior to belimumab initiation: Day 1 for patients randomised to belimumab in the double-blind period and Week 52 for patients randomised to placebo in the double-blind period.

PGA, Physician's Global Assessment; SD, standard deviation; SE, standard error; SELENA-SLEDAI, Safety of Estrogens in Lupus Erythematosus National Assessment version of the SLE Disease Activity Index; SLE, systemic lupus erythematosus.

**Supplementary Figure 3. Median percentage change from baseline by visit (Safety population; N=424) in (A) IgG (g/l) levels\*; (B) anti-dsDNA (IU/mL) levels; (C) C3 and C4 levels (mg/dl)**

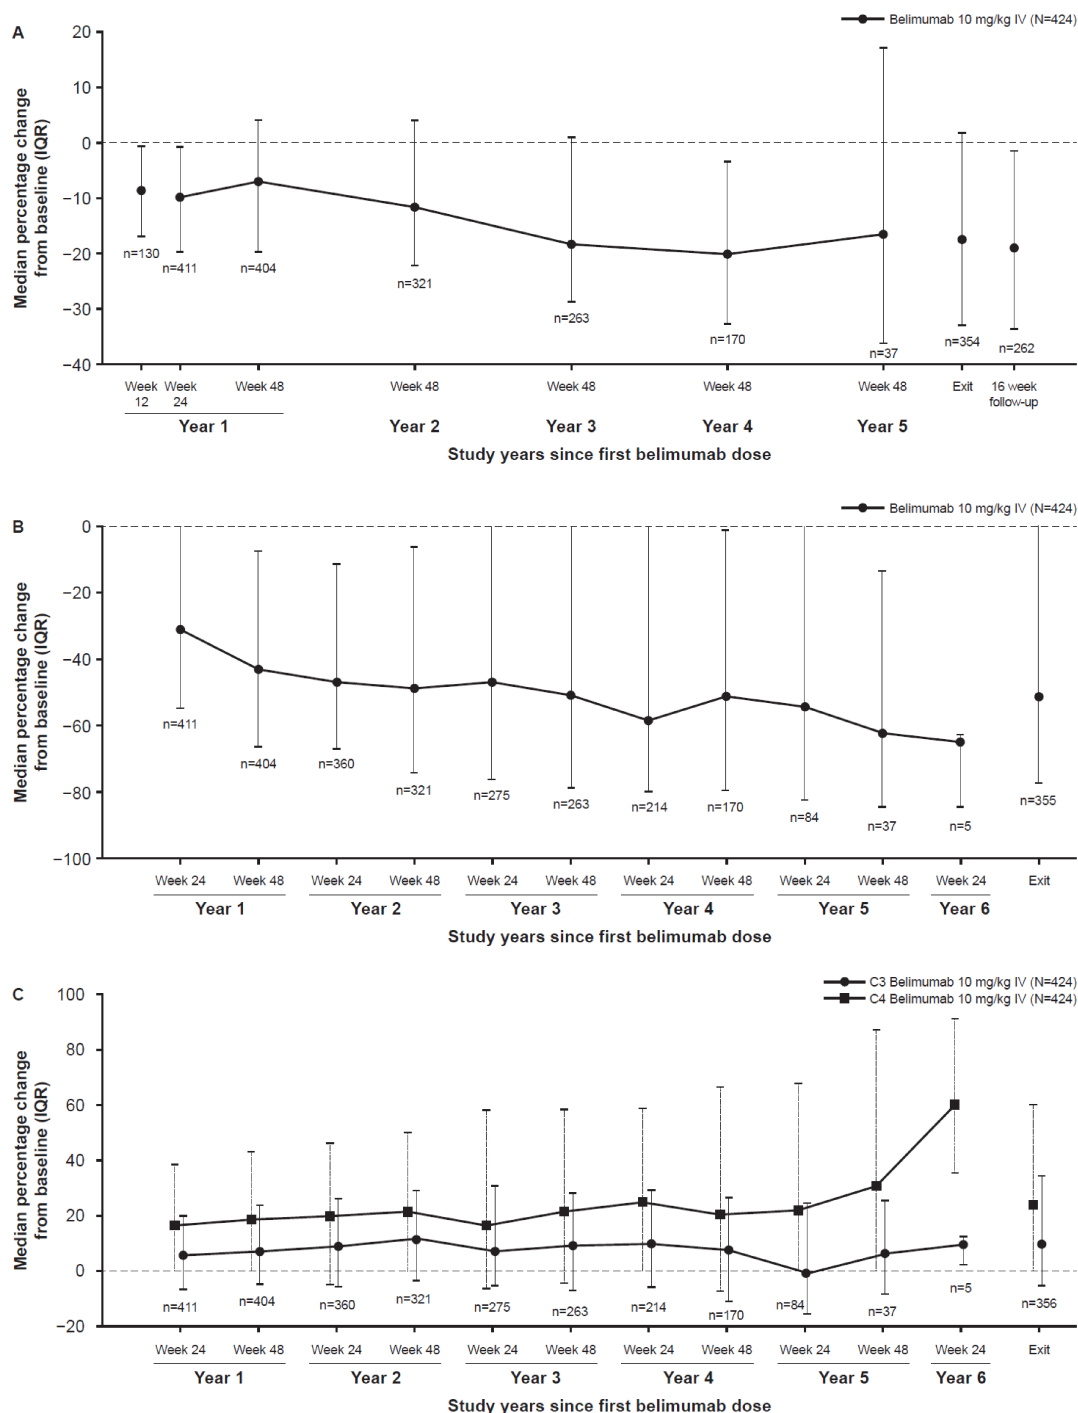

Median (IQR) baseline values: IgG 13.3 (10.9, 16.7) g/l (normal range: 6.94–16.18 g/l); anti-dsDNA 91.0 (33.0, 225.0) IU/ml (normal range: <30 IU/ml); C3 81.0 (67.0, 97.0) mg/dl (normal range: 90–180 mg/dl); and C4 14.0 (10.0, 20.0) mg/dl (normal range: normal range: 10–40 mg/dl).

\*At Year 1 Week 12, IgG was only assessed in the placebo group, for patients entering OL period.

**Note:** Baseline was defined as the last available value prior to belimumab initiation: Day 1 for patients randomised to belimumab in the double-blind period and Week 52 for patients randomised to placebo in the double-blind period.

Anti-dsDNA, anti-double stranded deoxyribonucleic acid; C, complement; Ig, immunoglobulin; IQR, interquartile range; IV, intravenous; OL, open-label.

**Supplementary Table 1. Baseline\* disease characteristics by double-blind period randomisation (Safety population; N=424)**

|                                                              | Double-blind period randomised treatment group |                   | Total OL population (N=424) |
|--------------------------------------------------------------|------------------------------------------------|-------------------|-----------------------------|
|                                                              | Placebo (n=134)                                | Belimumab (n=290) |                             |
| Mean SLE disease duration (SD) <sup>†</sup> , years          | 6.6 (5.0)                                      | 5.7 (4.7)         | 6.0 (4.8)                   |
| Median (minimum, maximum)                                    | 5.5 (1.1, 29.5)                                | 4.7 (0.1, 21.4)   | 5.0 (0.1, 29.5)             |
| <b>BILAG organ domain involvement<sup>‡</sup>, n (%)</b>     |                                                |                   |                             |
| <b>≥1A or 2B</b>                                             | 15 (11.2)                                      | 122 (42.1)        | 137 (32.3)                  |
| <b>≥1A</b>                                                   | 4 (3.0)                                        | 16 (5.5)          | 20 (4.7)                    |
| <b>≥1B</b>                                                   | 55 (41.0)                                      | 237 (81.7)        | 292 (68.9)                  |
| <b>No A or B</b>                                             | 76 (56.7)                                      | 51 (17.6)         | 127 (30.0)                  |
| <b>BILAG organ system involvement (A or B scores), n (%)</b> |                                                |                   |                             |
| <b>General</b>                                               | 1 (0.7)                                        | 13 (4.5)          | 14 (3.3)                    |
| <b>Mucocutaneous</b>                                         | 21 (15.7)                                      | 142 (49.0)        | 163 (38.4)                  |
| <b>Neurological</b>                                          | 0 (0)                                          | 0 (0)             | 0 (0)                       |
| <b>Musculoskeletal</b>                                       | 3 (2.2)                                        | 71 (24.5)         | 74 (17.5)                   |
| <b>Cardiovascular and Respiratory</b>                        | 0 (0)                                          | 1 (0.3)           | 1 (0.2)                     |
| <b>Vasculitis</b>                                            | 2 (1.5)                                        | 32 (11.0)         | 34 (8.0)                    |
| <b>Renal</b>                                                 | 22 (16.4)                                      | 75 (25.9)         | 97 (22.9)                   |
| <b>Haematology</b>                                           | 23 (17.2)                                      | 56 (19.3)         | 79 (18.6)                   |
| <b>Mean SELENA-SLEDAI score (SD)</b>                         | 5.0 (3.3)                                      | 9.4 (3.7)         | 8.0 (4.1)                   |
| <b>SELENA-SLEDAI category</b>                                |                                                |                   |                             |
| <b>≤9</b>                                                    | 120 (89.6)                                     | 157 (54.1)        | 277 (65.3)                  |
| <b>≥10</b>                                                   | 14 (10.4)                                      | 133 (45.9)        | 147 (34.7)                  |
| <b>SLE flare index<sup>‡</sup>, n (%)</b>                    |                                                |                   |                             |
| <b>≥1 flare</b>                                              | 23 (17.2)                                      | 40 (13.8)         | 63 (14.9)                   |
| <b>≥1 severe flare</b>                                       | 1 (0.7)                                        | 8 (2.8)           | 9 (2.1)                     |
| <b>Mean PGA (SD)</b>                                         | 1.1 (0.5)                                      | 1.6 (0.4)         | 1.5 (0.5)                   |
| <b>SDI score</b>                                             |                                                |                   |                             |
| <b>Mean (SD)</b>                                             | 0.2 (0.4)                                      | 0.1 (0.4)         | 0.2 (0.4)                   |
| <b>Median (minimum, maximum)</b>                             | 0 (0, 2)                                       | 0 (0, 3)          | 0 (0, 3)                    |
| <b>ANA</b>                                                   |                                                |                   |                             |
| <b>Positive (Index ≥0.80), n (%)</b>                         | 134 (100.0)                                    | 290 (100.0)       | 424 (100.0)                 |
| <b>Anti-dsDNA</b>                                            |                                                |                   |                             |
| <b>Positive (≥30 IU/ml), n (%)</b>                           | 91 (67.9)                                      | 233 (80.3)        | 324 (76.4)                  |
| <b>Complement level, n (%)</b>                               |                                                |                   |                             |
| <b>Low C3 (&lt;90 mg/dl) and/or low C4 (&lt;10 mg/dl)</b>    | 81 (60.4)                                      | 197 (67.9)        | 278 (65.6)                  |
| <b>No low C3 or C4</b>                                       | 53 (39.6)                                      | 93 (32.1)         | 146 (34.4)                  |
| <b>Mean proteinuria level (SD), g/24 hr</b>                  | 0.6 (1.2)                                      | 0.9 (1.2)         | 0.8 (1.2)                   |
| <b>Proteinuria category (g/24 hr), n (%)</b>                 |                                                |                   |                             |
| <b>≤0.5</b>                                                  | 91 (67.9)                                      | 156 (53.8)        | 247 (58.3)                  |
| <b>&gt;0.5</b>                                               | 43 (32.1)                                      | 134 (46.2)        | 177 (41.7)                  |
| <b>&gt;0.5 to &lt;1</b>                                      | 18 (13.4)                                      | 39 (13.4)         | 57 (13.4)                   |
| <b>1 to &lt;2</b>                                            | 15 (11.2)                                      | 56 (19.3)         | 71 (16.7)                   |
| <b>≥2</b>                                                    | 10 (7.5)                                       | 39 (13.4)         | 49 (11.6)                   |

\*Baseline was defined as the last available value prior to belimumab initiation: Day 1 for patients randomised to belimumab in the double-blind period and Week 52 for patients randomised to placebo in the double-blind period; <sup>†</sup>duration defined as (date of first belimumab dose – date of SLE diagnosis + 1)/365.25; <sup>‡</sup>patients may have been counted in more than one category.

ANA, anti-nuclear antibody; Anti-dsDNA, anti-double stranded deoxyribonucleic acid; BILAG, British Isles Lupus Assessment Group; C, complement; OL, open-label; PGA, Physician's Global Assessment; SD, standard deviation; SDI, Systemic Lupus International Collaborating Clinics/American College of Rheumatology Damage



Index; SELENA-SLEDAI, Safety of Estrogens in Lupus Erythematosus National Assessment version of the SLE Disease Activity Index; SLE, systemic lupus erythematosus.

Supplementary Table 2. Allowed concomitant SLE medication by year interval (Safety population; N=424)

|                                            | Number (%) of patients                         |                  |                  |                  |                  |                              |
|--------------------------------------------|------------------------------------------------|------------------|------------------|------------------|------------------|------------------------------|
|                                            | Any time post-first dose of belimumab* (N=424) | Year 0–1 (N=424) | Year 1–2 (N=404) | Year 2–3 (N=319) | Year 3–4 (N=251) | Year 4+ <sup>†</sup> (N=130) |
| <b>Corticosteroids</b>                     | 420 (99.1)                                     | 419 (98.8)       | 400 (99.0)       | 311 (97.5)       | 242 (96.4)       | 123 (94.6)                   |
| <b>Antimalarials</b>                       | 355 (83.7)                                     | 343 (80.9)       | 327 (80.9)       | 255 (79.9)       | 200 (79.7)       | 99 (76.2)                    |
| <b>Immunosuppressants/Immunomodulatory</b> | 314 (74.1)                                     | 284 (67.0)       | 267 (66.1)       | 203 (63.6)       | 151 (60.2)       | 75 (57.7)                    |
| <b>Aspirin</b>                             | 84 (19.8)                                      | 54 (12.7)        | 63 (15.6)        | 51 (16.0)        | 46 (18.3)        | 21 (16.2)                    |
| <b>NSAIDs</b>                              | 72 (17.0)                                      | 32 (7.5)         | 28 (6.9)         | 23 (7.2)         | 24 (9.6)         | 11 (8.5)                     |
| <b>Traditional Chinese medication</b>      |                                                |                  |                  |                  |                  |                              |
| <b>Glycosides of Paeony/Tripterygium</b>   | 109 (25.7)                                     | 83 (19.6)        | 82 (20.3)        | 59 (18.5)        | 45 (17.9)        | 26 (20.0)                    |
| <b>Paeonia (NOS)</b>                       | 9 (2.1)                                        | 1 (0.2)          | 4 (1.0)          | 3 (0.9)          | 0                | 0                            |
| <b>Paeonia extract (NOS)</b>               | 64 (15.1)                                      | 56 (13.2)        | 56 (13.9)        | 40 (12.5)        | 27 (10.8)        | 17 (13.1)                    |
| <b>Paeonia Rubra</b>                       | 1 (0.2)                                        | 1 (0.2)          | 0                | 0                | 0                | 0                            |
| <b>Paeonia Suffruticosa</b>                | 14 (3.3)                                       | 7 (1.7)          | 7 (1.7)          | 5 (1.6)          | 6 (2.4)          | 3 (2.3)                      |
| <b>Paeonia Alba</b>                        | 9 (2.1)                                        | 4 (0.9)          | 3 (0.7)          | 1 (0.3)          | 1 (0.4)          | 0                            |
| <b>Paeonia Alba extract</b>                | 14 (3.3)                                       | 10 (2.4)         | 10 (2.5)         | 9 (2.8)          | 8 (3.2)          | 6 (4.6)                      |
| <b>Tripterygium (NOS)</b>                  | 1 (0.2)                                        | 0                | 1 (0.2)          | 0                | 0                | 0                            |
| <b>Tripterygium Wilfordii</b>              | 13 (3.1)                                       | 11 (2.6)         | 10 (2.5)         | 7 (2.2)          | 5 (2.0)          | 1 (0.8)                      |
| <b>Tripterygium Wilfordii extract</b>      | 3 (0.7)                                        | 1 (0.2)          | 3 (0.7)          | 1 (0.3)          | 0                | 0                            |

\*Post-first dose of belimumab (baseline) includes time on study up to the 16-week follow-up visit post-last dose. Data from Year 0 to a patient's Exit visit (4 weeks post-last dose) are shown by years of study participation; <sup>†</sup>Year 4+ represents Year 4–5 and Year 5–6 of belimumab treatment.

Baseline was defined as the last available value prior to belimumab initiation: Day 1 for patients randomised to belimumab in the double-blind period and Week 52 for patients randomised to placebo in the double-blind period.

NSAIDs, non-steroidal anti-inflammatory drugs; NOS, not otherwise specified; SLE, systemic lupus erythematosus.
